# Supplementary material
Source: PubMed Central journal article supplement (PMC3099728)
Supplement: supp_M110.197905_jbc.M110.197905-1.pdf [file supp_M110.197905_jbc.M110.197905-1.pdf]

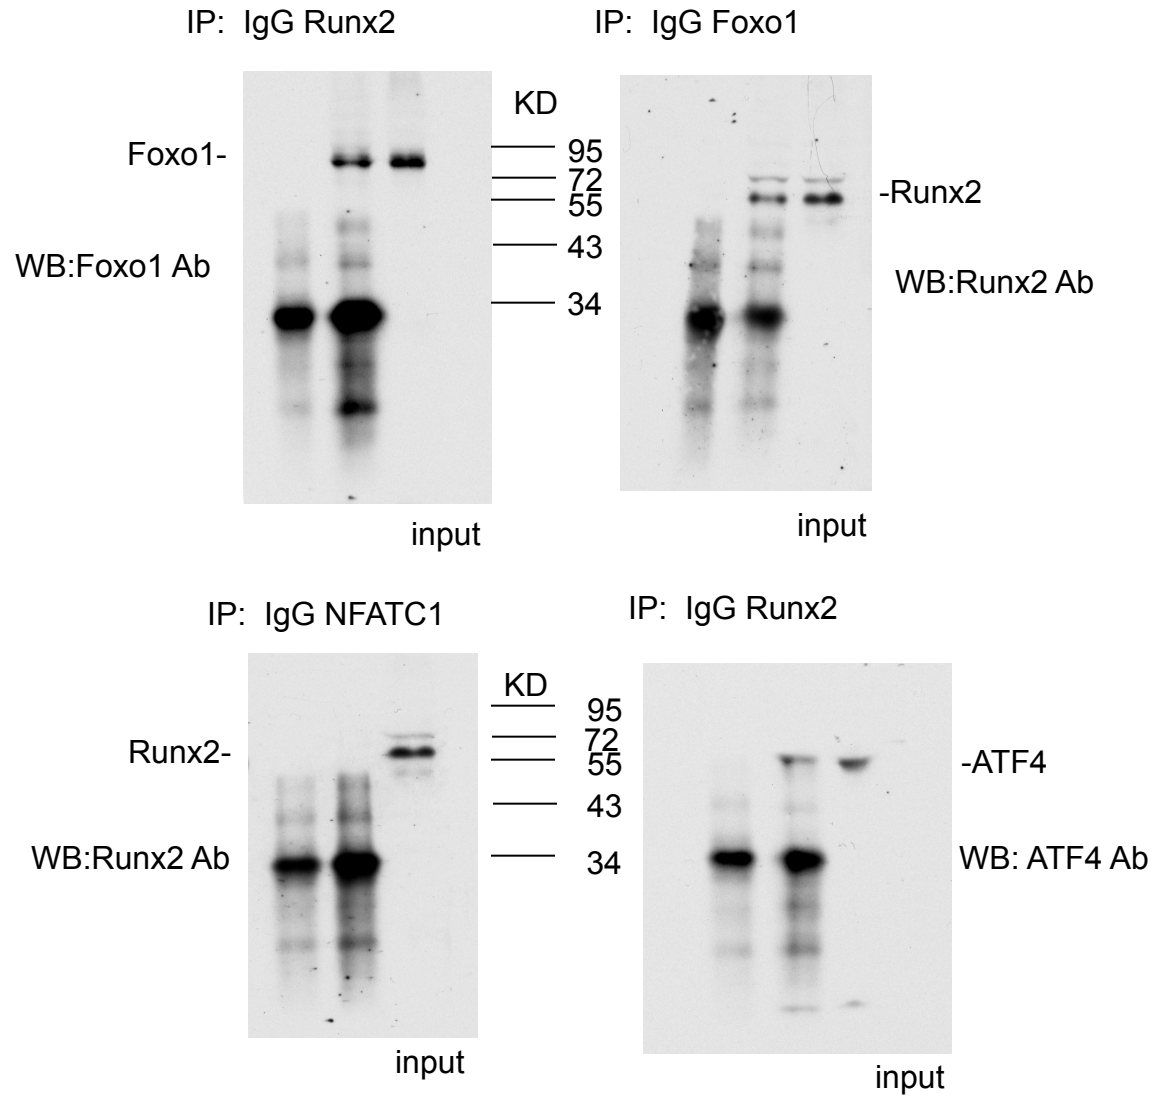

Fig S1: Nuclear extracts from UMR106-01 osteoblast-like cells were immunoprecipitated with control IgG or indicated antibodies, followed by Western blot analysis using indicated antibodies.

Fig S2

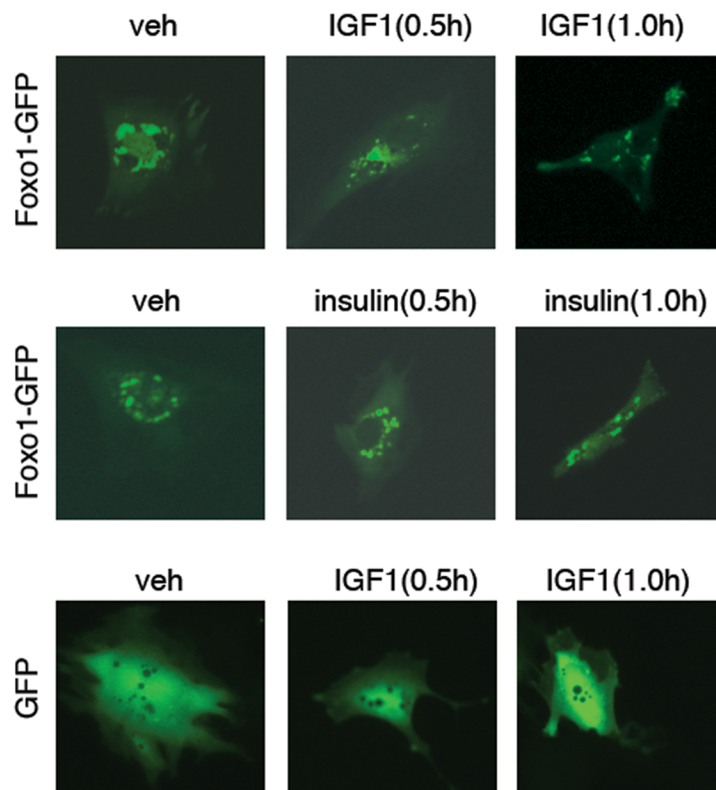

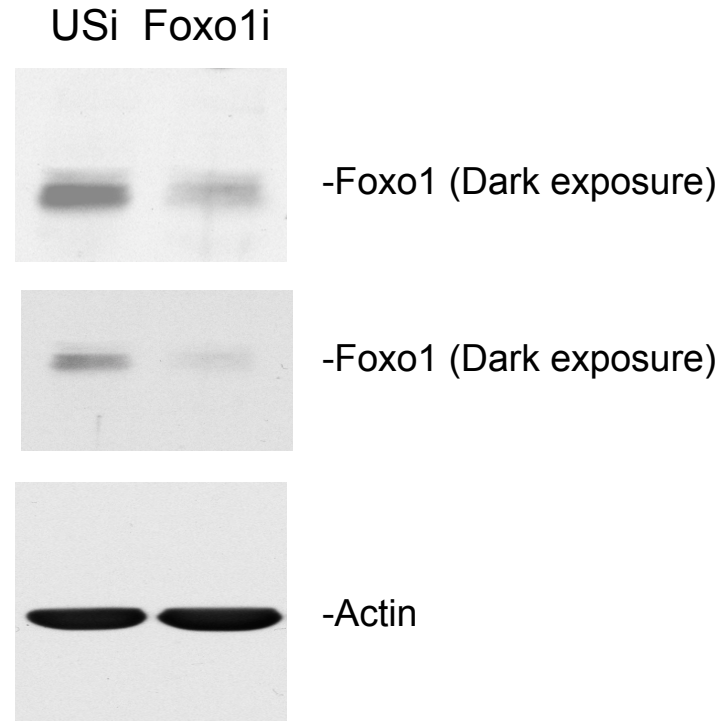

Figure S3: MC4 cells were infected with equal amount of adenovirus expressing Foxo1i or control RNAi (USi). 48 h later, cells were harvested by Western blot for Foxo1.
